# Supplementary material for: Use of satellite remote sensing to validate reservoir operations in global hydrological models: a case study from the CONUS
Source: Copernicus journal article supplement (doi:10.5194/hess-2023-215), 2023-09-12
Supplement: Supplementary file 1 [file hess-2023-215-supplement.pdf]

## **Supplemental material**

# **Use of satellite remote sensing to validate reservoir operations in global hydrological models: a case study from the CONUS**

5 Kedar Otta<sup>1</sup>, Hannes Müller Schmied<sup>2,3</sup>, Simon N. Gosling<sup>4</sup>, Naota Hanasaki<sup>1,5</sup>

<sup>1</sup>National Institute for Environmental Studies, Tsukuba, 305-8506, Japan

<sup>2</sup>Institute of Physical Geography, Goethe University Frankfurt, 60438 Frankfurt am Main, Germany

<sup>3</sup>Senckenberg Leibniz Biodiversity and Climate Research Centre (SBiK-F), 60325 Frankfurt am Main, Germany

<sup>4</sup>School of Geography, University of Nottingham, Nottingham NG7 2RD, United Kingdom

10 <sup>5</sup>The University of Tokyo, Tokyo, 113-0033, Japan

*Correspondence to:* Naota Hanasaki (hanasaki@nies.go.jp)

## Supplementary Figures

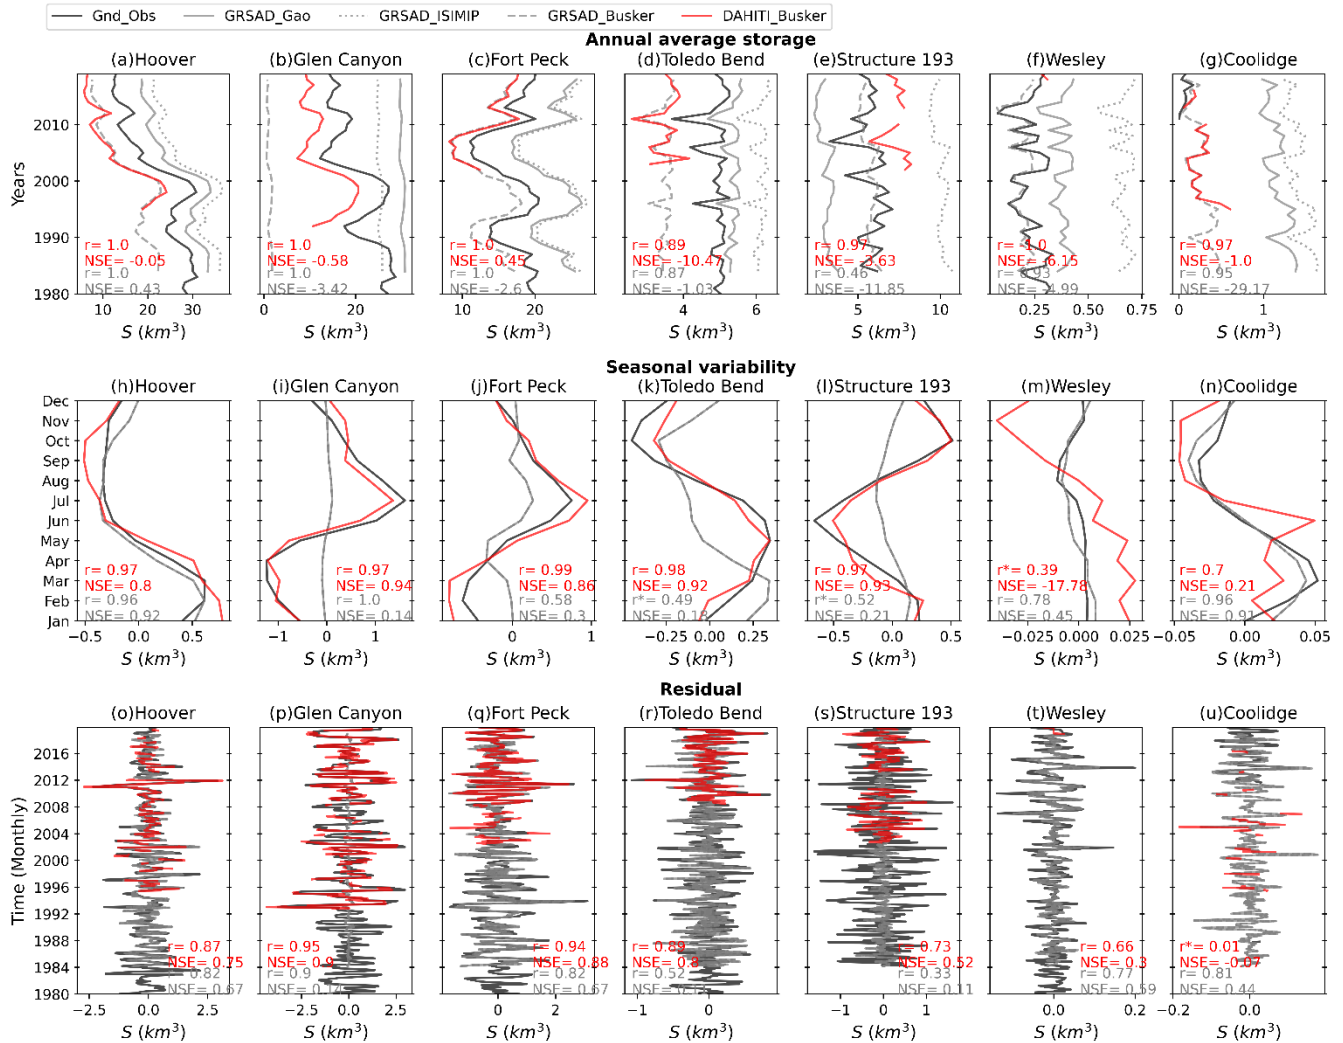

15

**Figure S1: Decomposed reservoir storage components from satellite and ground observation. Annual mean storage (a-g), seasonal variability (h-n), and residuals (o-u) from satellite-derived data for raw storage compared with ground observations. Corresponding correlation coefficients ( $r$ ) and NSE values are shown in the figure.  $r^*$  indicates insignificant correlation ( $p > 0.05$ ).**

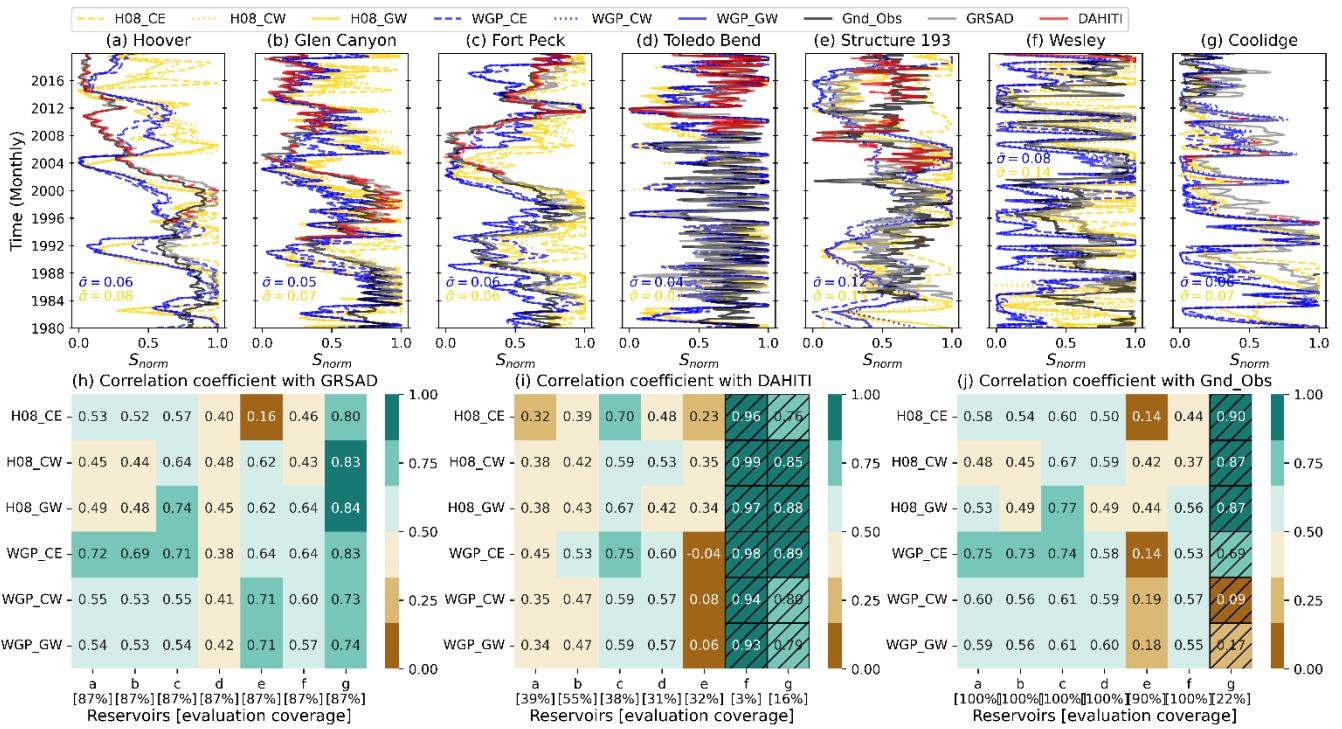

20 **Figure S2: Validation of simulated monthly normalized reservoir storage. (a)-(g) Model simulations compared with satellite data and ground truth for monthly normalized reservoir storage. (h)-(g) Average correlation coefficient with three evaluation datasets: GRSAD, DAHITI, and ground observation, respectively, for each of the reservoirs (a)-(g). The color indicates the magnitude of the correlation. Values in square brackets indicate percentage temporal coverage from 01/1980 to 12/2019 of reservoir storage for each reservoir's evaluation data. Reservoirs with hatched marks had < 30% coverage and were not included in subsequent analyses.**

25

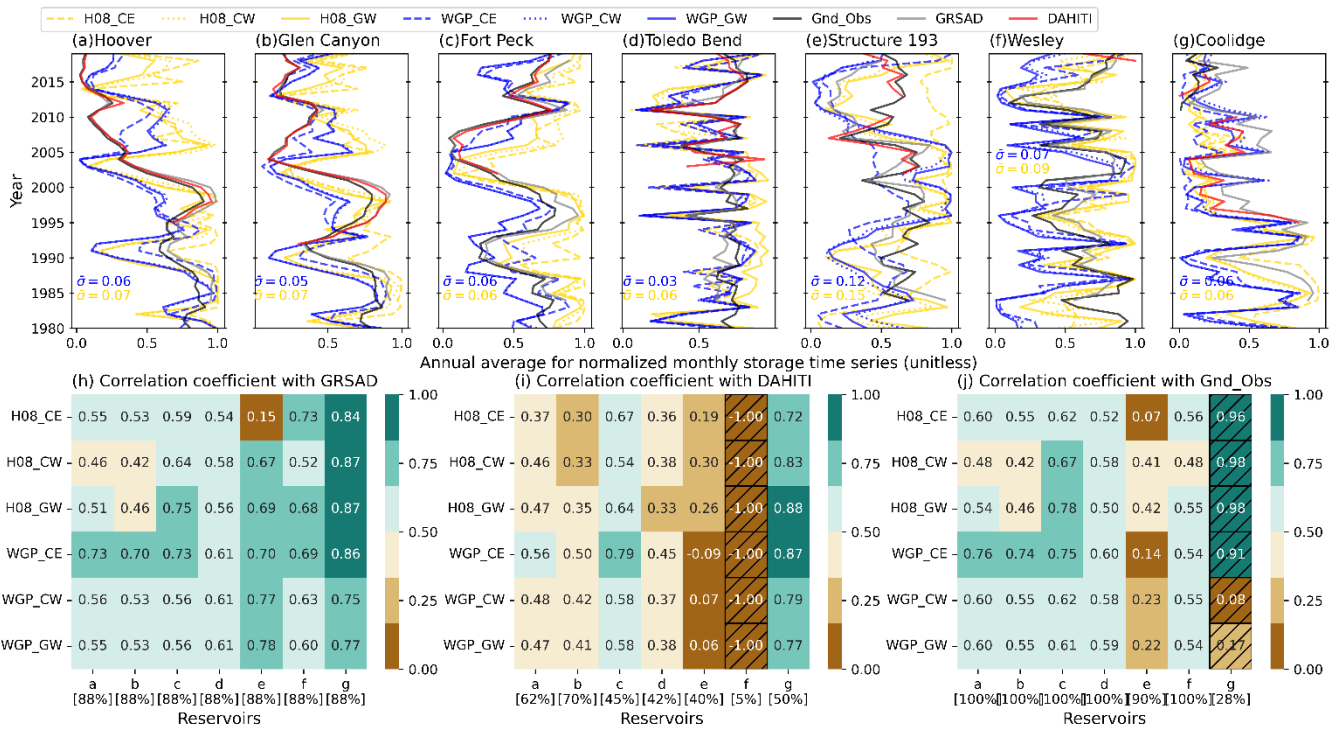

Figure S3: Same as Figure S2, but for annual average normalized reservoir storage.

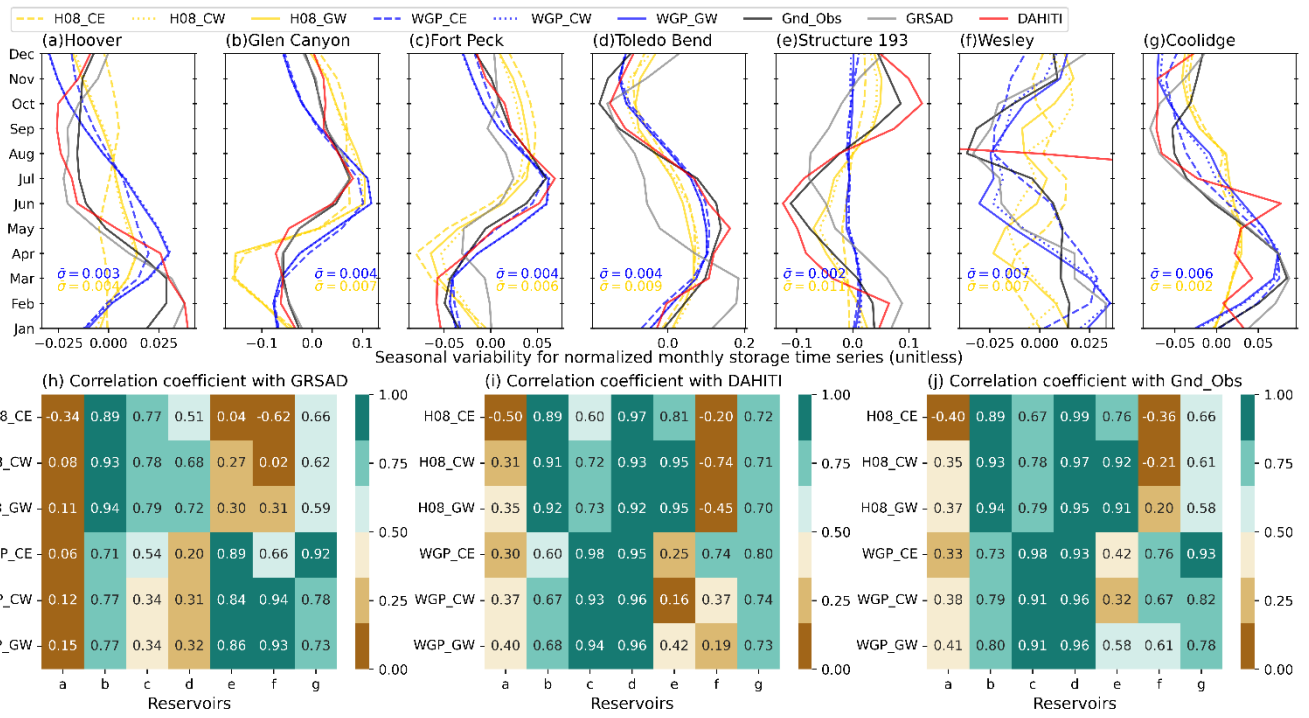

Figure S4: Same as Figure S2, but for simulated monthly seasonal variability of normalized reservoir storage.

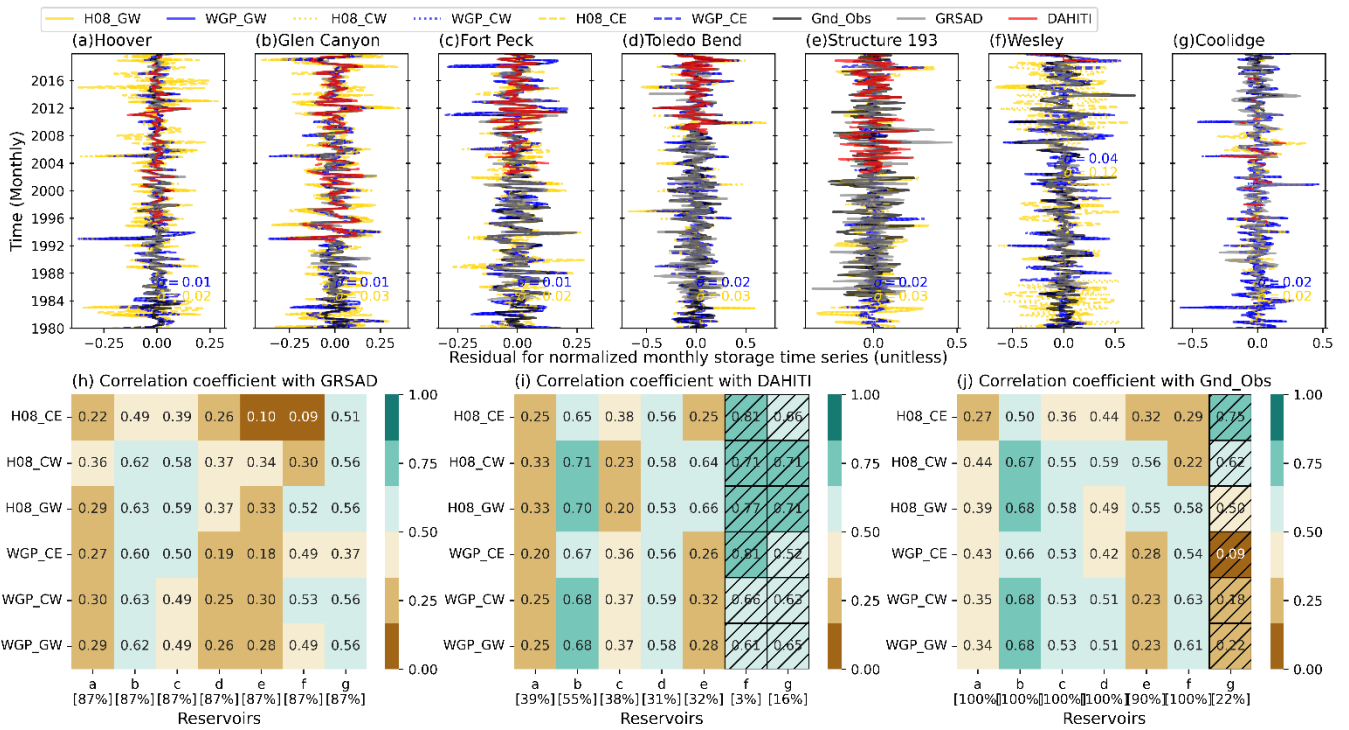

35 Figure S5: Same as Figure S2, but for the residuals of normalized reservoir storage ( $e_{norm,y,m}$ ).

## Supplementary Tables

**Table S1: The longitude (Lon) and latitude (Lat) of reservoirs in the GRanD dataset and 0.5°×0.5° grids recommended by ISIMIP, used by H08 and WaterGAP.**

| Dam name        | GRanD   |       | ISIMIP  |       | H08     |       | WaterGAP |       |
|-----------------|---------|-------|---------|-------|---------|-------|----------|-------|
|                 | Lon     | Lat   | Lon     | Lat   | Lon     | Lat   | Lon      | Lat   |
| Hoover          | -114.74 | 36.02 | -114.75 | 36.25 | -114.75 | 36.25 | -114.75  | 36.25 |
| Glen Canyon     | -111.49 | 36.94 | -111.25 | 37.25 | -110.75 | 37.25 | -111.25  | 37.25 |
| Fort Peck       | -106.41 | 48.00 | -106.25 | 47.75 | -106.25 | 48.25 | -106.25  | 47.75 |
| Toledo Bend     | -93.57  | 31.17 | -93.75  | 31.25 | -93.75  | 31.25 | -93.75   | 31.25 |
| Structure 193   | -81.10  | 26.94 | -81.25  | 26.75 | -81.25  | 26.75 | -81.25   | 26.75 |
| Wesley E. Seale | -97.87  | 28.05 | -97.75  | 28.25 | -97.75  | 28.25 | -97.75   | 28.25 |
| Coolidge        | -110.52 | 33.18 | -110.25 | 33.25 | -110.75 | 33.25 | -110.25  | 33.25 |

40

**Table S2: Storage capacity (Sc, in MCM) in the ISIMIP and the GRBD datasets, and A-h relationship parameters (a and b) from GRBD.**

| Dam name        | ISIMIP Sc | GRBD Sc   | a     | b        |
|-----------------|-----------|-----------|-------|----------|
| Hoover          | 36,700.00 | 34,069.08 | 0.136 | 288.760  |
| Glen Canyon     | 25,070.00 | 30,000.70 | 0.141 | 1047.200 |
| Fort Peck       | 23,560.00 | 22,773.70 | 0.044 | 643.317  |
| Toledo Bend     | 6,287.70  | 5,522.29  | 0.020 | 39.455   |
| Structure 193   | 10,510.00 | 3,546.48  | 0.006 | -5.575   |
| Wesley E. Seale | 655.00    | 370.04    | 0.104 | 20.256   |
| Coolidge        | 1,323.50  | 1,079.30  | 1.387 | 719.805  |

**Table S3: The starting and ending dates of ground observation as in the ResOpsUS dataset.**

| Dam name        | Time series start | Time series end |
|-----------------|-------------------|-----------------|
| Hoover          | 1934-04-01        | 2021-01-28      |
| Glen Canyon     | 1963-03-11        | 2021-01-27      |
| Fort Peck       | 1938-01-02        | 2002-06-20      |
| Toledo Bend     | 1966-10-02        | 2020-12-31      |
| Structure 193   | 1984-01-01        | 2021-01-31      |
| Wesley E. Seale | 1948-09-01        | 2020-12-31      |
| Coolidge        | 1980-01-01        | 2020-12-31      |

45

**Table S4: The correlation coefficient ( $r$ ), its corresponding p-value, and NSE for validation of reservoir storage from satellite data (GRSAD and DAHITI) compared against the ground truth (ResOpsUS) for monthly storage  $S_{m,y}$ . This table corresponds to Figure 3. For all correlations, the p-value was approximately 0.**

| <b>Metrics</b> | <b>Dams</b>          | <b>GRSAD_Gao</b> | <b>GRSAD_ISIMIP</b> | <b>GRSAD_Busker</b> | <b>DAHITI_Busker</b> |
|----------------|----------------------|------------------|---------------------|---------------------|----------------------|
| <b>r</b>       | <b>Hoover</b>        | 1.00             | 1.00                | 1.00                | 1.00                 |
|                | <b>Glen Canyon</b>   | 0.99             | 0.99                | 0.99                | 1.00                 |
|                | <b>Fort Peck</b>     | 0.98             | 0.98                | 0.98                | 1.00                 |
|                | <b>Toledo Bend</b>   | 0.63             | 0.63                | 0.63                | 0.98                 |
|                | <b>Structure 193</b> | 0.42             | 0.42                | 0.42                | 0.93                 |
|                | <b>Wesley</b>        | 0.89             | 0.89                | 0.89                | 0.99                 |
|                | <b>Coolidge</b>      | 0.89             | 0.89                | 0.89                | 0.94                 |
| <b>NSE</b>     | <b>Hoover</b>        | 0.43             | -0.32               | 0.05                | -0.18                |
|                | <b>Glen Canyon</b>   | -3.18            | -0.68               | -12.37              | -0.60                |
|                | <b>Fort Peck</b>     | -2.37            | -3.36               | 0.23                | 0.45                 |
|                | <b>Toledo Bend</b>   | -0.33            | -5.26               | -7.75               | -4.56                |
|                | <b>Structure 193</b> | -6.83            | -16.51              | 0.17                | -1.7                 |
|                | <b>Wesley</b>        | -3.50            | -32.85              | 0.57                | 0.75                 |
|                | <b>Coolidge</b>      | -81.99           | -129.38             | 0.58                | -0.37                |



Table S5: Same as Table S4, but for the normalized monthly storage ( $S_{norm,y,m}$ ). This table corresponds to Figure 3. For all correlations, the p-value was approximately 0.

| <b>Metric</b> | <b>Dam</b>           | <b>GRSAD_Gao</b> | <b>GRSAD_ISIMIP</b> | <b>GRSAD_Busker</b> | <b>DAHITI_Busker</b> |
|---------------|----------------------|------------------|---------------------|---------------------|----------------------|
| <b>r</b>      | <b>Hoover</b>        | 1.00             | 1.00                | 1.00                | 1.00                 |
|               | <b>Glen Canyon</b>   | 0.99             | 0.99                | 0.99                | 1.00                 |
|               | <b>Fort Peck</b>     | 0.98             | 0.98                | 0.98                | 1.00                 |
|               | <b>Toledo Bend</b>   | 0.63             | 0.63                | 0.63                | 0.98                 |
|               | <b>Structure 193</b> | 0.42             | 0.42                | 0.42                | 0.93                 |
|               | <b>Wesley</b>        | 0.89             | 0.89                | 0.89                | 0.99                 |
|               | <b>Coolidge</b>      | 0.89             | 0.89                | 0.89                | 0.94                 |
| <b>NSE</b>    | <b>Hoover</b>        | 0.94             | 0.94                | 0.94                | 0.98                 |
|               | <b>Glen Canyon</b>   | 0.93             | 0.93                | 0.93                | 0.95                 |
|               | <b>Fort Peck</b>     | 0.83             | 0.83                | 0.83                | 0.98                 |
|               | <b>Toledo Bend</b>   | 0.24             | 0.24                | 0.24                | 0.96                 |
|               | <b>Structure 193</b> | -1.27            | -1.27               | -1.27               | 0.63                 |
|               | <b>Wesley</b>        | 0.73             | 0.73                | 0.73                | -7.78                |
|               | <b>Coolidge</b>      | 0.20             | 0.20                | 0.20                | 0.89                 |

**Table S6: The correlation coefficient (r), its corresponding p-value, and NSE for validation of reservoir storage from satellite data (GRSAD and DAHITI) compared against the ground truth (ResOpsUS) for decomposed normalized storage. This table corresponds to Figure 4.**

| Metric         | Dam                  | Annual average storage |        | Seasonal variability |         | Residual |        |
|----------------|----------------------|------------------------|--------|----------------------|---------|----------|--------|
|                |                      | GRSAD                  | DAHITI | GRSAD                | DAHITI  | GRSAD    | DAHITI |
| <b>r</b>       | <b>Hoover</b>        | 1.00                   | 1.00   | 0.96                 | 0.97    | 0.82     | 0.87   |
|                | <b>Glen Canyon</b>   | 1.00                   | 1.00   | 1.00                 | 0.97    | 0.90     | 0.95   |
|                | <b>Fort Peck</b>     | 1.00                   | 1.00   | 0.58                 | 0.99    | 0.82     | 0.94   |
|                | <b>Toledo Bend</b>   | 0.87                   | 0.89   | 0.49                 | 0.98    | 0.52     | 0.89   |
|                | <b>Structure 193</b> | 0.46                   | 0.97   | 0.52                 | 0.97    | 0.33     | 0.73   |
|                | <b>Wesley</b>        | 0.93                   | -1.00  | 0.78                 | 0.39    | 0.77     | 0.66   |
|                | <b>Coolidge</b>      | 0.95                   | 0.97   | 0.96                 | 0.70    | 0.81     | 0.01   |
| <b>p-value</b> | <b>Hoover</b>        | 0.00                   | 0.00   | 0.00                 | 0.00    | 0.00     | 0.00   |
|                | <b>Glen Canyon</b>   | 0.00                   | 0.00   | 0.00                 | 0.00    | 0.00     | 0.00   |
|                | <b>Fort Peck</b>     | 0.00                   | 0.00   | 0.05                 | 0.00    | 0.00     | 0.00   |
|                | <b>Toledo Bend</b>   | 0.00                   | 0.00   | 0.11                 | 0.00    | 0.00     | 0.00   |
|                | <b>Structure 193</b> | 0.01                   | 0.00   | 0.09                 | 0.00    | 0.00     | 0.00   |
|                | <b>Wesley</b>        | 0.00                   | 0.00   | 0.00                 | 0.21    | 0.00     | 0.01   |
|                | <b>Coolidge</b>      | 0.00                   | 0.01   | 0.00                 | 0.01    | 0.00     | 0.99   |
| <b>NSE</b>     | <b>Hoover</b>        | 0.95                   | 0.98   | 0.82                 | 0.71    | 0.64     | 0.73   |
|                | <b>Glen Canyon</b>   | 0.94                   | 0.95   | 0.99                 | 0.92    | 0.73     | 0.85   |
|                | <b>Fort Peck</b>     | 0.85                   | 0.98   | 0.33                 | 0.92    | 0.62     | 0.89   |
|                | <b>Toledo Bend</b>   | 0.71                   | 0.72   | -0.01                | 0.96    | -0.24    | 0.79   |
|                | <b>Structure 193</b> | -2.00                  | 0.72   | 0.10                 | 0.76    | -0.34    | 0.34   |
|                | <b>Wesley</b>        | 0.79                   | -41.80 | 0.27                 | -288.88 | 0.60     | 0.14   |
|                | <b>Coolidge</b>      | 0.69                   | 0.30   | 0.82                 | 0.26    | 0.09     | -0.06  |

Table S7: Mean model variability with input forcings ( $\bar{\sigma}$ ). This table corresponds to Figure 4-8 (a-g) in the main article.

|                      | Monthly storage |      | Annual storage |      | average Seasonal variability |       | Residuals |      |
|----------------------|-----------------|------|----------------|------|------------------------------|-------|-----------|------|
|                      | WGP             | H08  | WGP            | H08  | WGP                          | H08   | WGP       | H08  |
| <b>Hoover</b>        | 0.06            | 0.08 | 0.06           | 0.07 | 0.003                        | 0.004 | 0.01      | 0.02 |
| <b>Glen Canyon</b>   | 0.05            | 0.07 | 0.05           | 0.07 | 0.004                        | 0.007 | 0.01      | 0.03 |
| <b>Fort Peck</b>     | 0.06            | 0.06 | 0.06           | 0.06 | 0.004                        | 0.006 | 0.01      | 0.02 |
| <b>Toledo Bend</b>   | 0.04            | 0.07 | 0.03           | 0.06 | 0.004                        | 0.009 | 0.02      | 0.03 |
| <b>Structure 193</b> | 0.12            | 0.15 | 0.12           | 0.15 | 0.002                        | 0.011 | 0.02      | 0.03 |
| <b>Wesley</b>        | 0.08            | 0.14 | 0.07           | 0.09 | 0.007                        | 0.007 | 0.04      | 0.12 |
| <b>Coolidge</b>      | 0.06            | 0.07 | 0.06           | 0.06 | 0.006                        | 0.002 | 0.02      | 0.02 |
